# Supplementary material
Source: PubMed Central journal article supplement (PMC3864319)
Supplement: 1302334110_pnas.201302334SI.pdf [file 1302334110_pnas.201302334SI.pdf]

# Supporting Information

Gillespie et al. 10.1073/pnas.1302334110

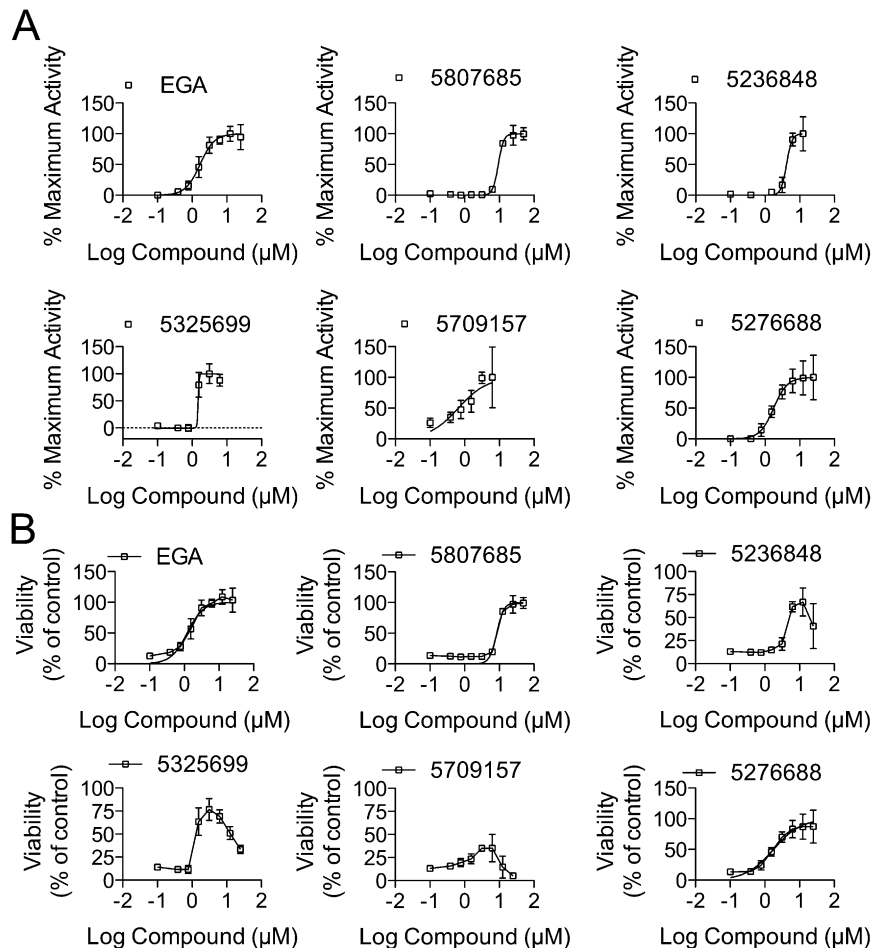

**Fig. S1.** Dose titrations of top hits from high-throughput screen. RAW264.7 cells were seeded at  $2 \times 10^3$  cells/well in 384-well plates, pretreated with various doses of indicated compounds for 1 h, and then challenged with 231 ng/mL protective antigen (PA) and 33 ng/mL lethal factor (LF). Cell viability was measured 4–6 h later by ATPlite 1step reagent (Perkin-Elmer). Luminescence was measured on a Victor<sup>3</sup>V plate reader, and results were normalized to unintoxicated controls. Results represent average values from three independent experiments performed in triplicate  $\pm$ SD. (A) Calculation of  $IC_{50}$  values. Maximum viability provided by each compound was set at 100% activity, and viability in the absence of drug (toxin only) was set at 0% activity.  $IC_{50}$  values were calculated using nonlinear fit (variable slope) of normalized data (Prism 5, GraphPad). (B) Maximum viability provided by each compound. Data were normalized to unintoxicated controls (set at 100% viability), and the maximum protection provided by each was determined and graphed in Fig. 1B.
